# Supplementary material
Source: MDPI journal article supplement (https://www.mdpi.com/2073-4433/8/12/251)
Supplement: s1 [file s1]

# An evaluation of the CHIMERE chemistry transport model to simulate dust outbreaks across the north Hemisphere in March 2014

Bertrand Bessagnet <sup>1\*</sup>, Laurent Menut <sup>2</sup>, Augustin Colette <sup>1</sup>, Florian Couvidat <sup>1</sup>, Mo Dan <sup>3</sup>, Sylvain Mailler <sup>2,4</sup>, Laurent Létinois <sup>1</sup>, Véronique Pont <sup>5</sup>, Laurence Rouil <sup>1</sup>

<sup>1</sup> INERIS, National Institute for Industrial Environment and Risks, Parc Technologique ALATA, 60550 Verneuil-en-Halatte, France

<sup>2</sup> Laboratoire de Météorologie Dynamique, Ecole Polytechnique, PSL Research University, Ecole Normale Supérieure, Université Paris-Saclay, Sorbonne Universités, UPMC University Paris 06, CNRS, Route de Saclay, 91128 Palaiseau, France

<sup>3</sup> Central Laboratory, Beijing Municipal Institute of Labour Protection, Room 317, 55 Taoranting Road, Xicheng District, Beijing 100054, China

<sup>4</sup> École des Ponts ParisTech, Université Paris-Est, 77455 Champs-sur-Marne, France

<sup>5</sup> Laboratoire d'Aérodynamique, 14 Avenue Edouard Belin, 31400 Toulouse, Université de Toulouse, CNRS, UPS, France

\* Correspondence: bertrand.bessagnet@ineris.fr; Tel.: +33-3-44-55-65-33

## LIST OF TABLES AND FIGURES

### Tables

|                                                                                                                                                                |   |
|----------------------------------------------------------------------------------------------------------------------------------------------------------------|---|
| Table S1. Error statistics (Correlation, Root Mean Square Error - RMSE, Bias) for CHIMERE at several AERONET stations over the north Hemisphere for March 2014 | 4 |
| Table S2. Characteristics, locations of EBAS-EMEP sites used in this study                                                                                     | 5 |

### Figures

|                                                                                                                                                                                                                                                                                                                                                                                                                                                           |    |
|-----------------------------------------------------------------------------------------------------------------------------------------------------------------------------------------------------------------------------------------------------------------------------------------------------------------------------------------------------------------------------------------------------------------------------------------------------------|----|
| Figure S1. Cross sections of CHIMERE dust concentrations (right) for several orbits zoomed over the highest values area versus the corresponding CALIPSO qualitative data (left) showing in yellow the dust load and in orange the polluted dust, for the CALIPSO trajectories NAM1-6 as reported in Figure 2 in the publication. The dotted line represents the height of the boundary layer, the dashed lines represent the fraction of fine dust in %. | 6  |
| Figure S2. Cross sections of CHIMERE dust concentrations (right) for several orbits zoomed over the highest values area versus the corresponding CALIPSO qualitative data (left) showing in yellow the dust load and in orange the polluted dust, for the CALIPSO trajectories EUR1-5 as reported in Figure 2 in the publication. The dotted line represents the height of the boundary layer, the dashed lines represent the fraction of fine dust in %. | 7  |
| Figure S3. Cross sections of CHIMERE dust concentrations (right) for several orbits zoomed over the highest values area versus the corresponding CALIPSO qualitative data (left) showing in yellow the dust load and in orange the polluted dust, for the CALIPSO trajectories CAR1-6 as reported in Figure 2 in the publication. The dotted line represents the height of the boundary layer, the dashed lines represent the fraction of fine dust in %. | 8  |
| Figure S4. Cross sections of CHIMERE dust concentrations (right) for several orbits zoomed over the highest values area versus the corresponding CALIPSO qualitative data (left) showing in yellow the dust load and in orange the polluted dust, for the CALIPSO trajectories CAS1-6 as reported in Figure 2 in the publication. The dotted line represents the height of the boundary layer, the dashed lines represent the fraction of fine dust in %. | 9  |
| Figure S5. Cross sections of CHIMERE dust concentrations (right) for several orbits zoomed over the highest values area versus the corresponding CALIPSO qualitative data (left) showing in yellow the dust load and in orange the polluted dust, for the CALIPSO trajectories CNA1-6 as reported in Figure 2 in the publication. The dotted line represents the height of the boundary layer, the dashed lines represent the fraction of fine dust in %. | 10 |
| Figure S6. Map of site locations presented in the publication for AERONET stations (a), IMPROVE stations (b), US EPA networks for PM2.5 data (c), EBAS-EMEP stations (d) see Table S2 for the names of EMEP stations, French stations close to the Pyrenees area (e), Chinese stations (f) and the two stations in the Caribbean area (g).                                                                                                                | 11 |
| Figure S7. Evolution of mean daily concentrations integrated over the column (in $g\ m^{-2}$ ) of total dust from March 1 <sup>st</sup> , to March 8 <sup>th</sup> , 2014 in the free troposphere (FT) and the boundary layer (BL)                                                                                                                                                                                                                        | 12 |
| Figure S8. Evolution of mean daily concentrations integrated over the column (in $g\ m^{-2}$ ) of total dust from March 9 <sup>th</sup> , to March 16 <sup>th</sup> , 2014 in the free troposphere (FT) and the boundary layer (BL)                                                                                                                                                                                                                       | 13 |
| Figure S9. Evolution of mean daily concentrations integrated over the column (in $g\ m^{-2}$ ) of total dust from March 17 <sup>th</sup> , to March 24 <sup>th</sup> , 2014 in the free troposphere (FT) and the boundary layer (BL)                                                                                                                                                                                                                      | 14 |
| Figure S10. Evolution of mean daily concentrations integrated over the column (in $g\ m^{-2}$ ) of total dust from March 25 <sup>th</sup> , to March 31 <sup>st</sup> , 2014 in the free troposphere (FT) and the boundary layer (BL)                                                                                                                                                                                                                     | 15 |

Figure S11. Monthly mean latitudinal cross sections (Altitude  $a$ . g. l. versus Latitude  $^{\circ}$ N) for several variables in March 2014 simulated by CHIMERE over the north hemisphere. Top panels represent the mean dust concentrations with bold dashed lines representing the fine fraction of total dusts (%), the grey dotted lines are the average zonal winds (conventionally, westerly wind are positive). Bottom charts represent the evolution of various parameters along the corresponding cross sections and spatially averaged over the longitude: the boundary layer (BL) height in km, the total precipitation (convective and large scale) in  $\text{cm month}^{-1}$ , the deep convection updraft flux summed over the column in  $\text{g}_{\text{air}} \text{m}^{-2} \text{s}^{-1}$ , the mean cloud water content averaged over the first 10 model layers (approximately 2500m), the wet and dry deposition fluxes of dust sum over time (monthly) in  $\text{mg}_{\text{dust}} \text{m}^{-2} \text{month}^{-1}$  and the ratio  $\Omega$  (unit less) of dry (d) and wet (w) scavenging coefficients coarse versus fine particles as defined in equation 1 in the publication). \_\_\_\_\_ 16

Figure S12. PM2.5 time series at Chihuahua station (Mexico) for CHIMERE and the corresponding observations. The orange shade area represents the dust in the PM2.5 matrix simulated by CHIMERE. \_\_\_\_\_ 17

Figure S13. AOD from AERONET network at Ittoqqortoormitt in March 2014, level 1.5 (left) and level 2 (right) (source: NASA, <https://aeronet.gsfc.nasa.gov/>) \_\_\_\_\_ 18

Figure S14. Mean sea surface temperature in March 2014 (source: NASA <https://worldview.earthdata.nasa.gov/>) \_\_\_\_\_ 18

Figure S 15. Cross sections of CHIMERE dust concentrations (right) for several orbits zoomed over the highest values area versus the corresponding CALIPSO qualitative data (left) showing in yellow the dust load and in orange the polluted dust, for the CALIPSO trajectories PAC-1-2 as reported in Figure 2 in the publication. The dotted line represents the height of the boundary layer, the dashed lines represent the fraction of fine dust in %. \_\_\_\_\_ 19

Figure S16. Longitudinal cross section of total dust concentrations fields (Altitude versus longitude) at  $39.9^{\circ}$ N latitude from  $110^{\circ}$ E to  $120^{\circ}$ E passing over Beijing (BJ in blue letters) from March 12<sup>th</sup> 00:00 UTC to March 15<sup>th</sup>, 21:00 UTC. The dotted line represents the height of the boundary layer, the dashed lines represent the fraction of fine dust in %. \_\_\_\_\_ 20

Figure S17. Longitudinal cross section of total dust concentrations fields (Altitude versus longitude) at  $39.9^{\circ}$ N latitude from  $110^{\circ}$ E to  $120^{\circ}$ E passing over Beijing (BJ in blue letters) from March 16<sup>th</sup> 00:00 UTC to March 19<sup>th</sup>, 21:00 UTC. The dotted line represents the height of the boundary layer, the dashed lines represent the fraction of fine dust in %. \_\_\_\_\_ 21

Table S1. Error statistics (Correlation, Root Mean Square Error - RMSE, Bias) for CHIMERE at several AERONET stations over the north Hemisphere for March 2014

| Site                 | N*  | Obs.                | Mod. | Cor.  | RMSE <sup>+</sup> | Bias  |
|----------------------|-----|---------------------|------|-------|-------------------|-------|
| <i>Boulder</i>       | 115 | 0.03                | 0.12 | 0.02  | 6.91              | 0.09  |
| <i>Yuma</i>          | 221 | 0.06                | 0.11 | 0.10  | 2.40              | 0.06  |
| <i>Red Mountain</i>  | 127 | 0.01                | 0.06 | 0.12  | 38.48             | 0.05  |
| <i>Barbados</i>      | 120 | 0.10                | 0.15 | 0.33  | 2.03              | 0.05  |
| <i>UPRM</i>          | 160 | 0.07                | 0.10 | 0.27  | 1.48              | 0.02  |
| <i>Cape San Juan</i> | 255 | 0.07                | 0.13 | 0.09  | 1.89              | 0.06  |
| <i>Petrolina</i>     | 114 | 0.06                | 0.03 | 0.20  | 0.50              | -0.03 |
| <i>Calhau</i>        | 102 | 0.09                | 0.14 | 0.70  | 2.92              | 0.05  |
| <i>Capo Verde</i>    | 98  | 0.13                | 0.22 | 0.79  | 2.64              | 0.09  |
| <i>Edinburgh</i>     | 65  | 0.04                | 0.32 | -0.20 | 9.58              | 0.27  |
| <i>Graciosa</i>      | 69  | 0.07                | 0.22 | 0.04  | 3.06              | 0.15  |
| <i>Coruna</i>        | 40  | 0.05                | 0.14 | 0.42  | 2.29              | 0.09  |
| <i>Toulouse</i>      | 137 | 0.06                | 0.50 | 0.04  | 14.15             | 0.45  |
| <i>Cabauw</i>        | 113 | 0.15                | 0.71 | 0.07  | 8.82              | 0.56  |
| <i>Dushanbe</i>      | 53  | 0.09                | 0.46 | 0.29  | 5.49              | 0.37  |
| <i>Jaipur</i>        | 203 | 0.24                | 0.29 | -0.27 | 1.26              | 0.06  |
| <i>Qoms</i>          | 224 | 0.02                | 0.35 | 0.09  | 25.16             | 0.33  |
| <i>Dalanzadgad</i>   | 197 | 0.08                | 0.65 | 0.24  | 16.23             | 0.57  |
| <i>XiangHe</i>       | 162 | 0.40                | 0.68 | 0.11  | 5.57              | 0.28  |
| <i>Gosan</i>         | 113 | 0.17                | 0.39 | -0.11 | 5.11              | 0.22  |
| <i>Noto</i>          | 63  | 0.15                | 0.41 | 0.09  | 2.88              | 0.25  |
| <i>Mauna</i>         | 171 | 0.01                | 0.06 | 0.32  | 5.16              | 0.04  |
| <i>Midway</i>        | 70  | 0.07                | 0.31 | 0.15  | 5.35              | 0.24  |
| <i>Izana</i>         | 243 | 0.01                | 0.12 | 0.46  | 15.27             | 0.11  |
| <i>Dakar</i>         | 258 | 0.26                | 0.20 | 0.76  | 0.35              | -0.06 |
| <i>Camaguey</i>      | 152 | 0.08                | 0.13 | 0.62  | 0.88              | 0.04  |
| <i>Beijing</i>       | 179 | 0.47                | 0.63 | -0.07 | 3.98              | 0.17  |
| <i>Ieodo</i>         | 87  | 0.15                | 0.36 | 0.41  | 2.36              | 0.21  |
| <i>Pokhara</i>       | 140 | 0.20                | 0.38 | 0.00  | 1.64              | 0.18  |
| <i>Cinzana</i>       | 287 | 0.32                | 0.21 | 0.60  | 0.51              | -0.11 |
| <i>Murcia</i>        | 213 | 0.09                | 0.21 | 0.85  | 5.78              | 0.12  |
| <b>Average</b>       |     | $Cor_s^{**} = 0.54$ |      | 0.24  | 6.46              | 0.16  |

\*Number of available hourly observations, <sup>+</sup>Root mean Square Error, <sup>\*\*</sup>Spatial correlation

**Table S2. Characteristics, locations of EBAS-EMEP sites used in this study**

| Site code | Site name | Lon E (°) | Lat N (°) | Alt. (m) |
|-----------|-----------|-----------|-----------|----------|
| AM01      | AM0001R   | 44.26     | 40.38     | 2080     |
| AT02      | AT0002R   | 16.77     | 47.77     | 117      |
| AT05      | AT0005R   | 12.97     | 46.68     | 1020     |
| AT48      | AT0048R   | 14.44     | 47.84     | 899      |
| CH01      | CH0001G   | 7.99      | 46.55     | 3578     |
| CH02      | CH0002R   | 6.94      | 46.81     | 489      |
| CH03      | CH0003R   | 8.90      | 47.48     | 539      |
| CH04      | CH0004R   | 6.98      | 47.05     | 1137     |
| CH05      | CH0005R   | 8.46      | 47.07     | 1031     |
| CY02      | CY0002R   | 33.06     | 35.04     | 532      |
| CZ03      | CZ0003R   | 15.08     | 49.57     | 535      |
| CZ05      | CZ0005R   | 13.60     | 49.07     | 1118     |
| DE43      | DE0043G   | 11.01     | 47.80     | 985      |
| DE44      | DE0044R   | 12.93     | 51.53     | 86       |
| DK03      | DK0003R   | 9.60      | 56.35     | 13       |
| DK12      | DK0012R   | 12.09     | 55.69     | 3        |
| EE09      | EE0009R   | 25.90     | 59.50     | 32       |
| EE11      | EE0011R   | 21.82     | 58.38     | 6        |
| ES01      | ES0001R   | -4.35     | 39.55     | 917      |
| ES05      | ES0005R   | -8.92     | 42.73     | 683      |
| ES07      | ES0007R   | -3.53     | 37.23     | 1265     |
| ES08      | ES0008R   | -4.85     | 43.44     | 134      |
| ES09      | ES0009R   | -3.14     | 41.28     | 1360     |
| ES10      | ES0010R   | 3.32      | 42.32     | 23       |
| ES11      | ES0011R   | -6.92     | 38.48     | 393      |
| ES12      | ES0012R   | -1.10     | 39.09     | 885      |
| ES13      | ES0013R   | -5.87     | 41.28     | 985      |
| ES14      | ES0014R   | 0.72      | 41.40     | 470      |
| ES16      | ES0016R   | -7.70     | 43.23     | 506      |
| ES17      | ES0017R   | -6.33     | 37.03     | 5        |
| FI09      | FI0009R   | 21.38     | 59.78     | 7        |
| FI18      | FI0018R   | 27.67     | 60.53     | 4        |
| FI36      | FI0036R   | 24.24     | 68.00     | 340      |
| FR09      | FR0009R   | 4.63      | 49.90     | 390      |
| FR10      | FR0010R   | 4.08      | 47.27     | 620      |
| FR13      | FR0013R   | 0.18      | 43.62     | 200      |

| Site code | Site name | Lon E (°) | Lat N (°) | Alt. (m) |
|-----------|-----------|-----------|-----------|----------|
| FR14      | FR0014R   | 6.83      | 47.30     | 836      |
| FR15      | FR0015R   | -0.75     | 46.65     | 133      |
| FR18      | FR0018R   | -0.45     | 48.63     | 309      |
| FR23      | FR0023R   | 5.28      | 44.57     | 605      |
| FR24      | FR0024R   | -1.84     | 47.83     | 29       |
| FR25      | FR0025R   | 2.61      | 46.81     | 182      |
| GB06      | GB0006R   | -7.87     | 54.44     | 126      |
| GB36      | GB0036R   | -1.32     | 51.57     | 137      |
| GB43      | GB0043R   | -4.69     | 51.78     | 160      |
| GB48      | GB0048R   | -3.24     | 55.79     | 260      |
| HU02      | HU0002R   | 19.58     | 46.97     | 125      |
| IE01      | IE0001R   | -10.24    | 51.94     | 11       |
| IE05      | IE0005R   | -6.92     | 52.87     | 59       |
| IE06      | IE0006R   | -7.34     | 55.38     | 20       |
| IE08      | IE0008R   | -6.36     | 52.18     | 9        |
| IT01      | IT0001R   | 12.63     | 42.10     | 48       |
| LV10      | LV0010R   | 21.17     | 56.16     | 18       |
| MD13      | MD0013R   | 28.28     | 46.49     | 166      |
| MK07      | MK0007R   | 20.69     | 41.54     | 1332     |
| NL07      | NL0007R   | 6.57      | 52.08     | 20       |
| NL09      | NL0009R   | 6.28      | 53.33     | 1        |
| NL10      | NL0010R   | 5.85      | 51.54     | 28       |
| NL44      | NL0644R   | 4.92      | 51.97     | 1        |
| NL91      | NL0091R   | 4.50      | 52.30     | 4        |
| NO02      | NO0002R   | 8.25      | 58.39     | 219      |
| NO15      | NO0015R   | 13.92     | 65.83     | 439      |
| NO39      | NO0039R   | 8.88      | 62.78     | 210      |
| NO42      | NO0042G   | 11.89     | 78.91     | 474      |
| NO56      | NO0056R   | 11.08     | 60.37     | 300      |
| RO08      | RO0008R   | 25.13     | 47.32     | 908      |
| SE05      | SE0005R   | 15.33     | 63.85     | 404      |
| SE11      | SE0011R   | 13.15     | 56.02     | 175      |
| SE12      | SE0012R   | 17.38     | 58.80     | 20       |
| SE14      | SE0014R   | 11.91     | 57.39     | 5        |
| SI08      | SI0008R   | 14.87     | 45.57     | 520      |
| SK06      | SK0006R   | 22.27     | 49.05     | 345      |

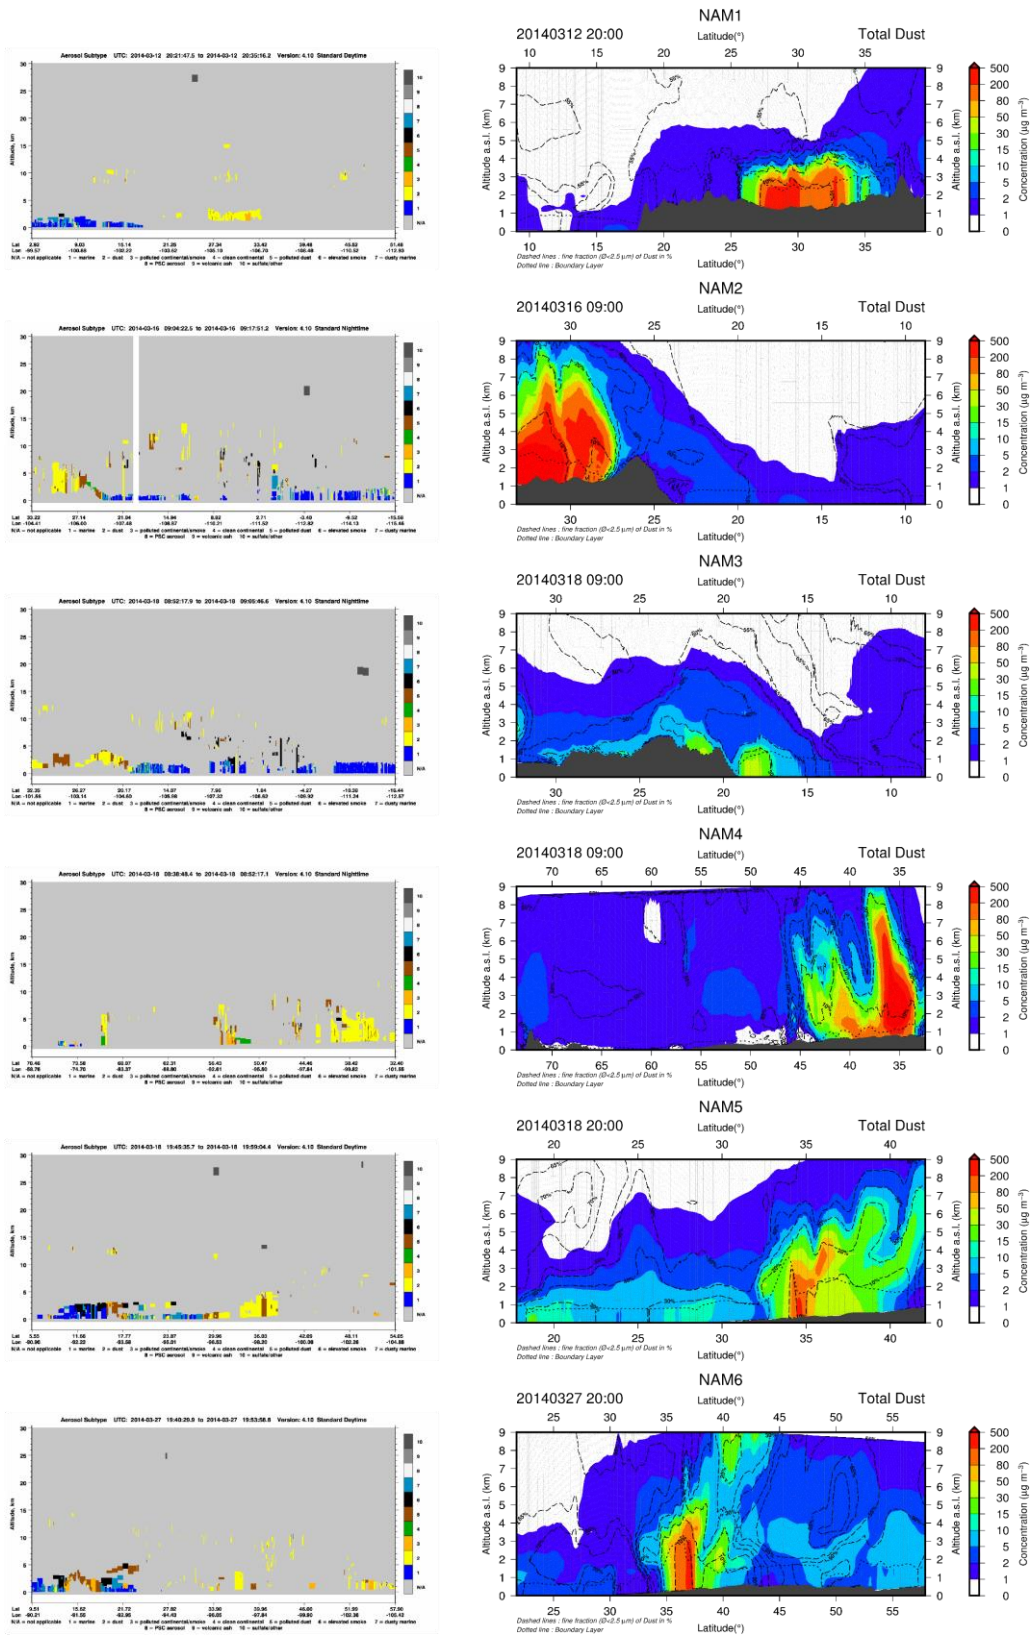

Figure S1. Cross sections of CHIMERE dust concentrations (right) for several orbits zoomed over the highest values area *versus* the corresponding CALIPSO qualitative data (left) showing in yellow the dust load and in orange the polluted dust, for the CALIPSO trajectories NAM1-6 as reported in Figure 2 in the publication. The dotted line represents the height of the boundary layer, the dashed lines represent the fraction of fine dust in %.

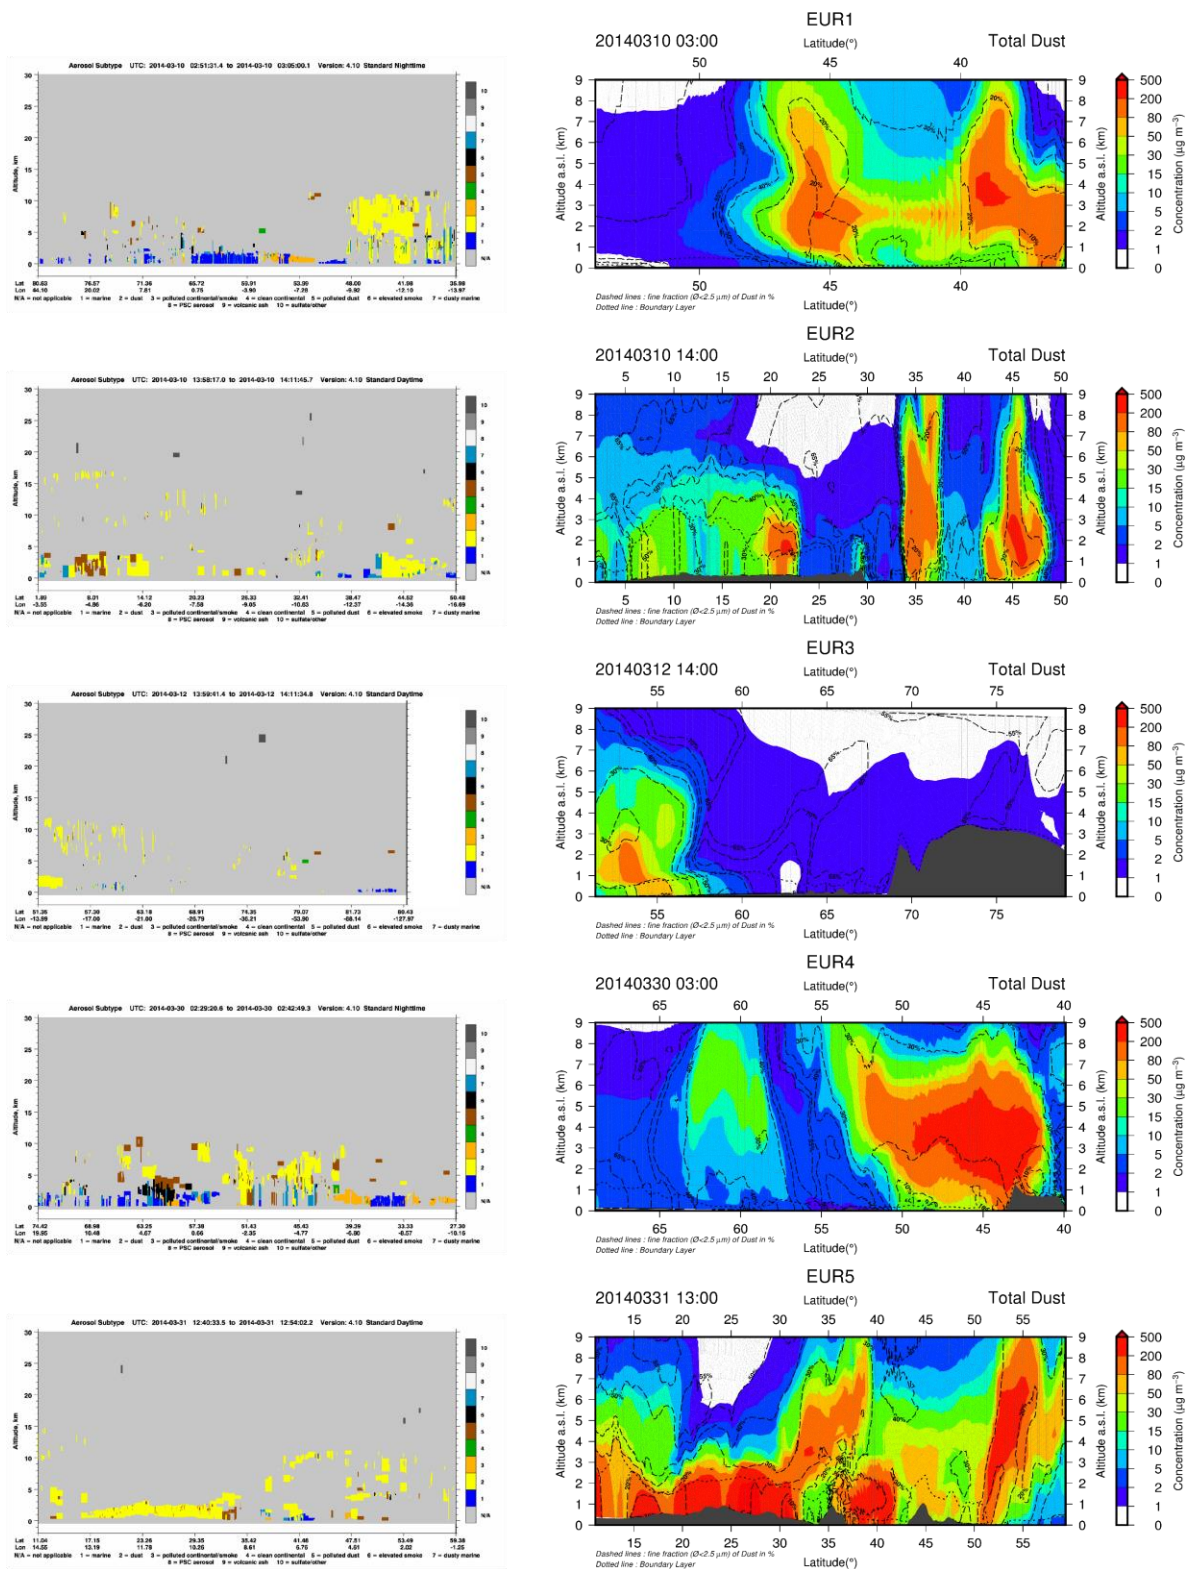

Figure S2. Cross sections of CHIMERE dust concentrations (right) for several orbits zoomed over the highest values area *versus* the corresponding CALIPSO qualitative data (left) showing in yellow the dust load and in orange the polluted dust, for the CALIPSO trajectories EUR1-5 as reported in Figure 2 in the publication. The dotted line represents the height of the boundary layer, the dashed lines represent the fraction of fine dust in %.



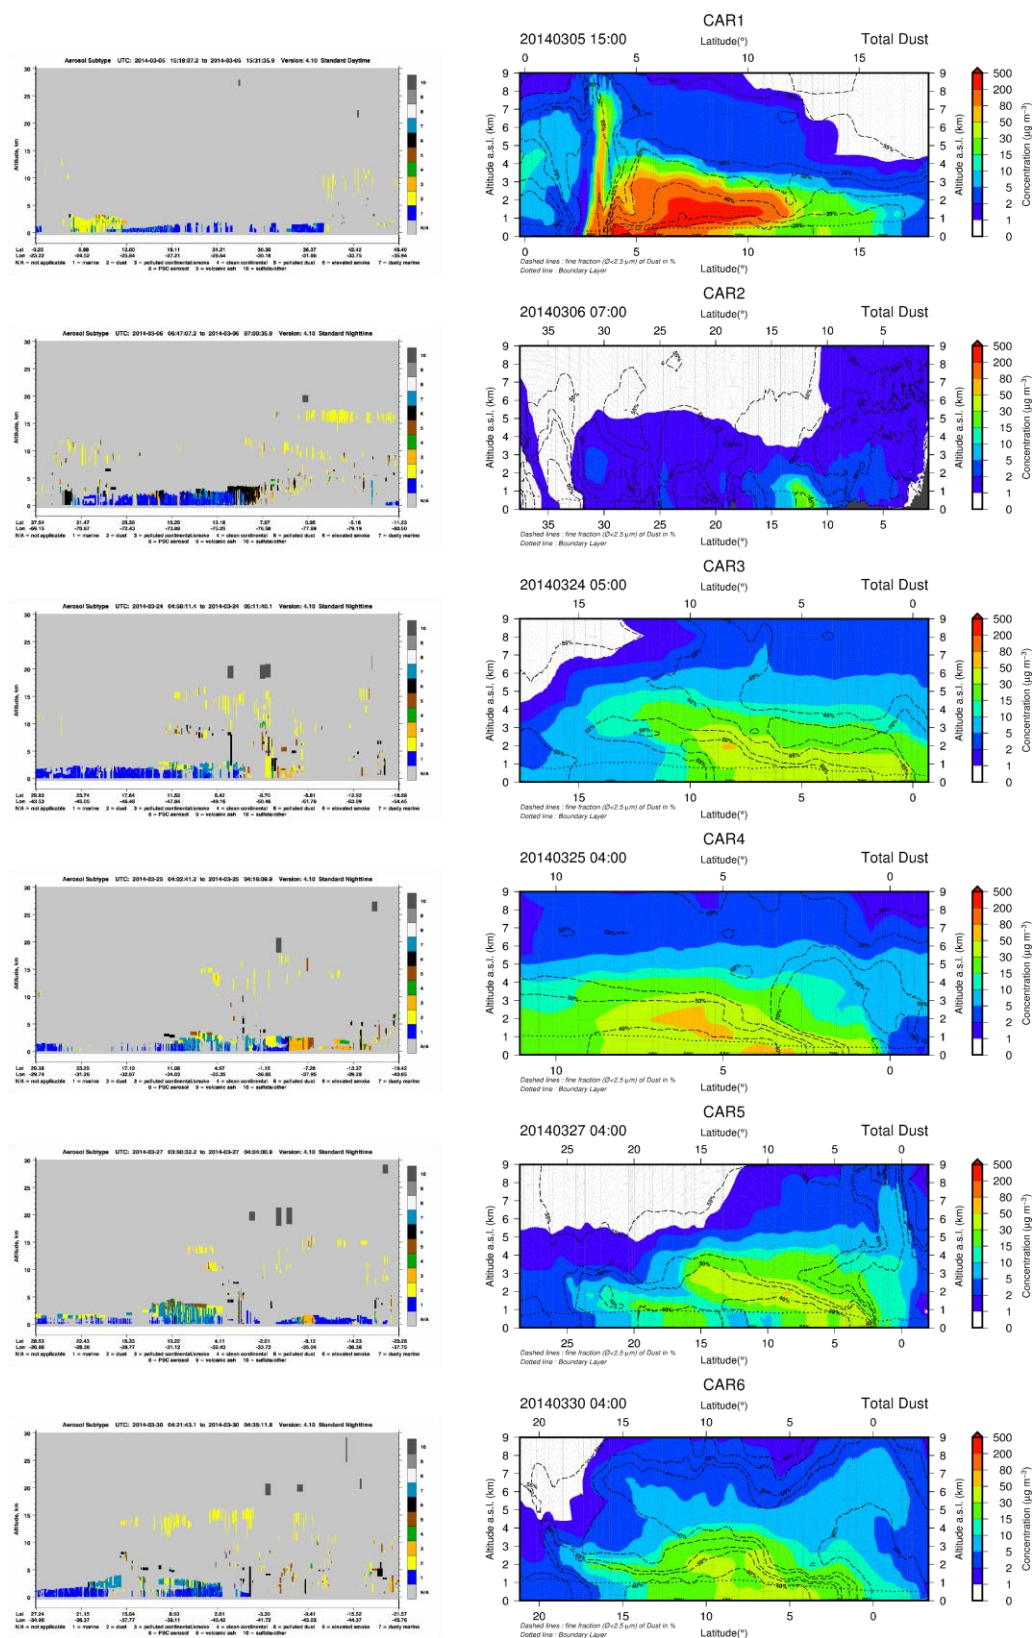

Figure S3. Cross sections of CHIMERE dust concentrations (right) for several orbits zoomed over the highest values area *versus* the corresponding CALIPSO qualitative data (left) showing in yellow the dust load and in orange the polluted dust, for the CALIPSO trajectories CAR1-6 as reported in Figure 2 in the publication. The dotted line represents the height of the boundary layer, the dashed lines represent the fraction of fine dust in %.



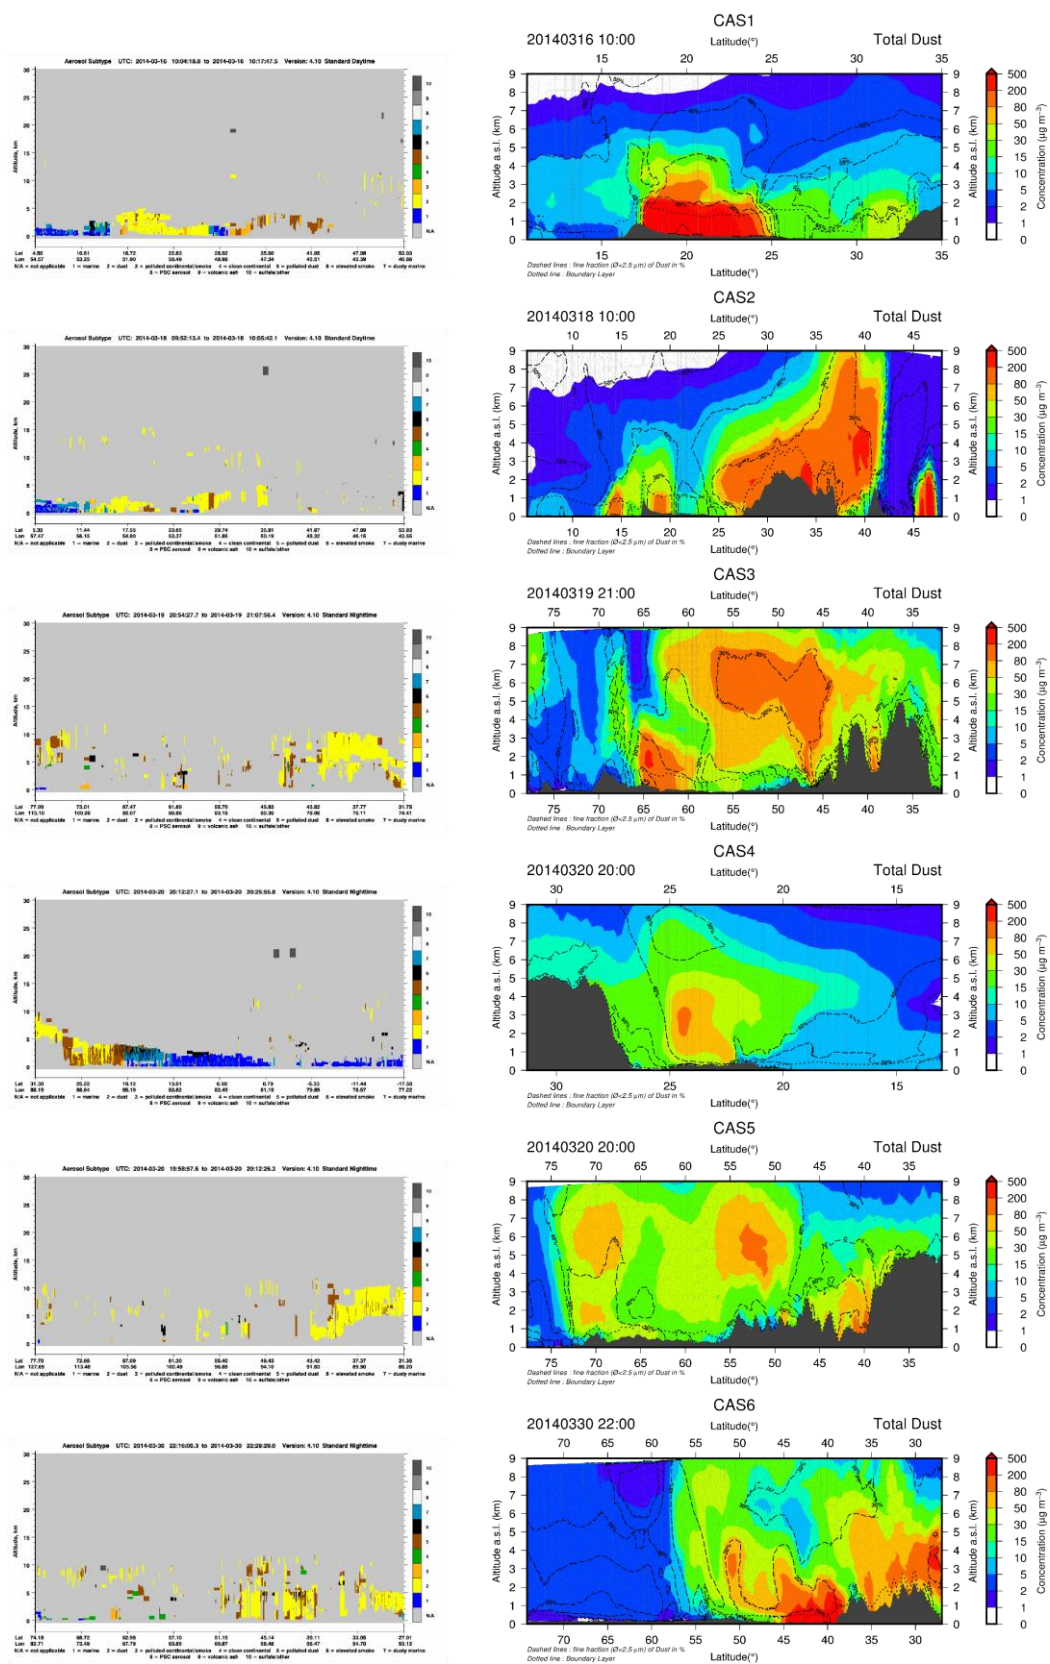

Figure S4. Cross sections of CHIMERE dust concentrations (right) CAS for several orbits zoomed over the highest values area *versus* the corresponding CALIPSO qualitative data (left) showing in yellow the dust load and in orange the polluted dust, for the CALIPSO trajectories CAS1-6 as reported in Figure 2 in the publication. The dotted line represents the height of the boundary layer, the dashed lines represent the fraction of fine dust in %.

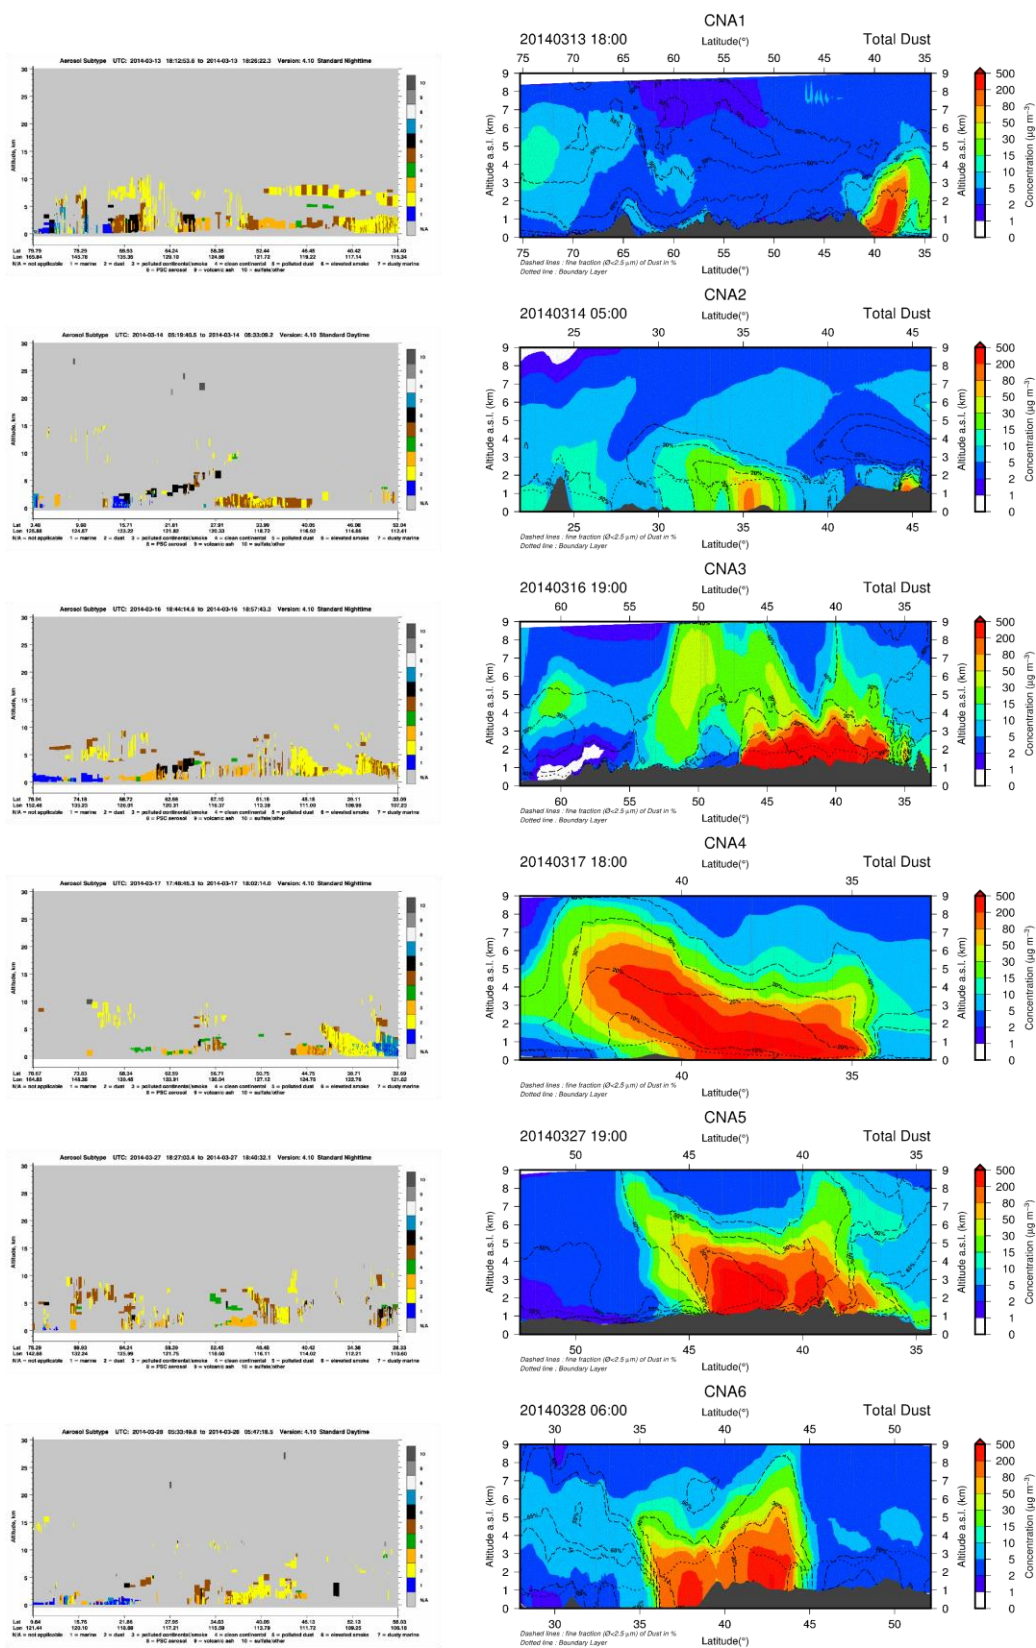

Figure S5. Cross sections of CHIMERE dust concentrations (right) for several orbits zoomed over the highest values area *versus* the corresponding CALIPSO qualitative data (left) showing in yellow the dust load and in orange the polluted dust, for the CALIPSO trajectories CNA1-6 as reported in Figure 2 in the publication. The dotted line represents the height of the boundary layer, the dashed lines represent the fraction of fine dust in %.



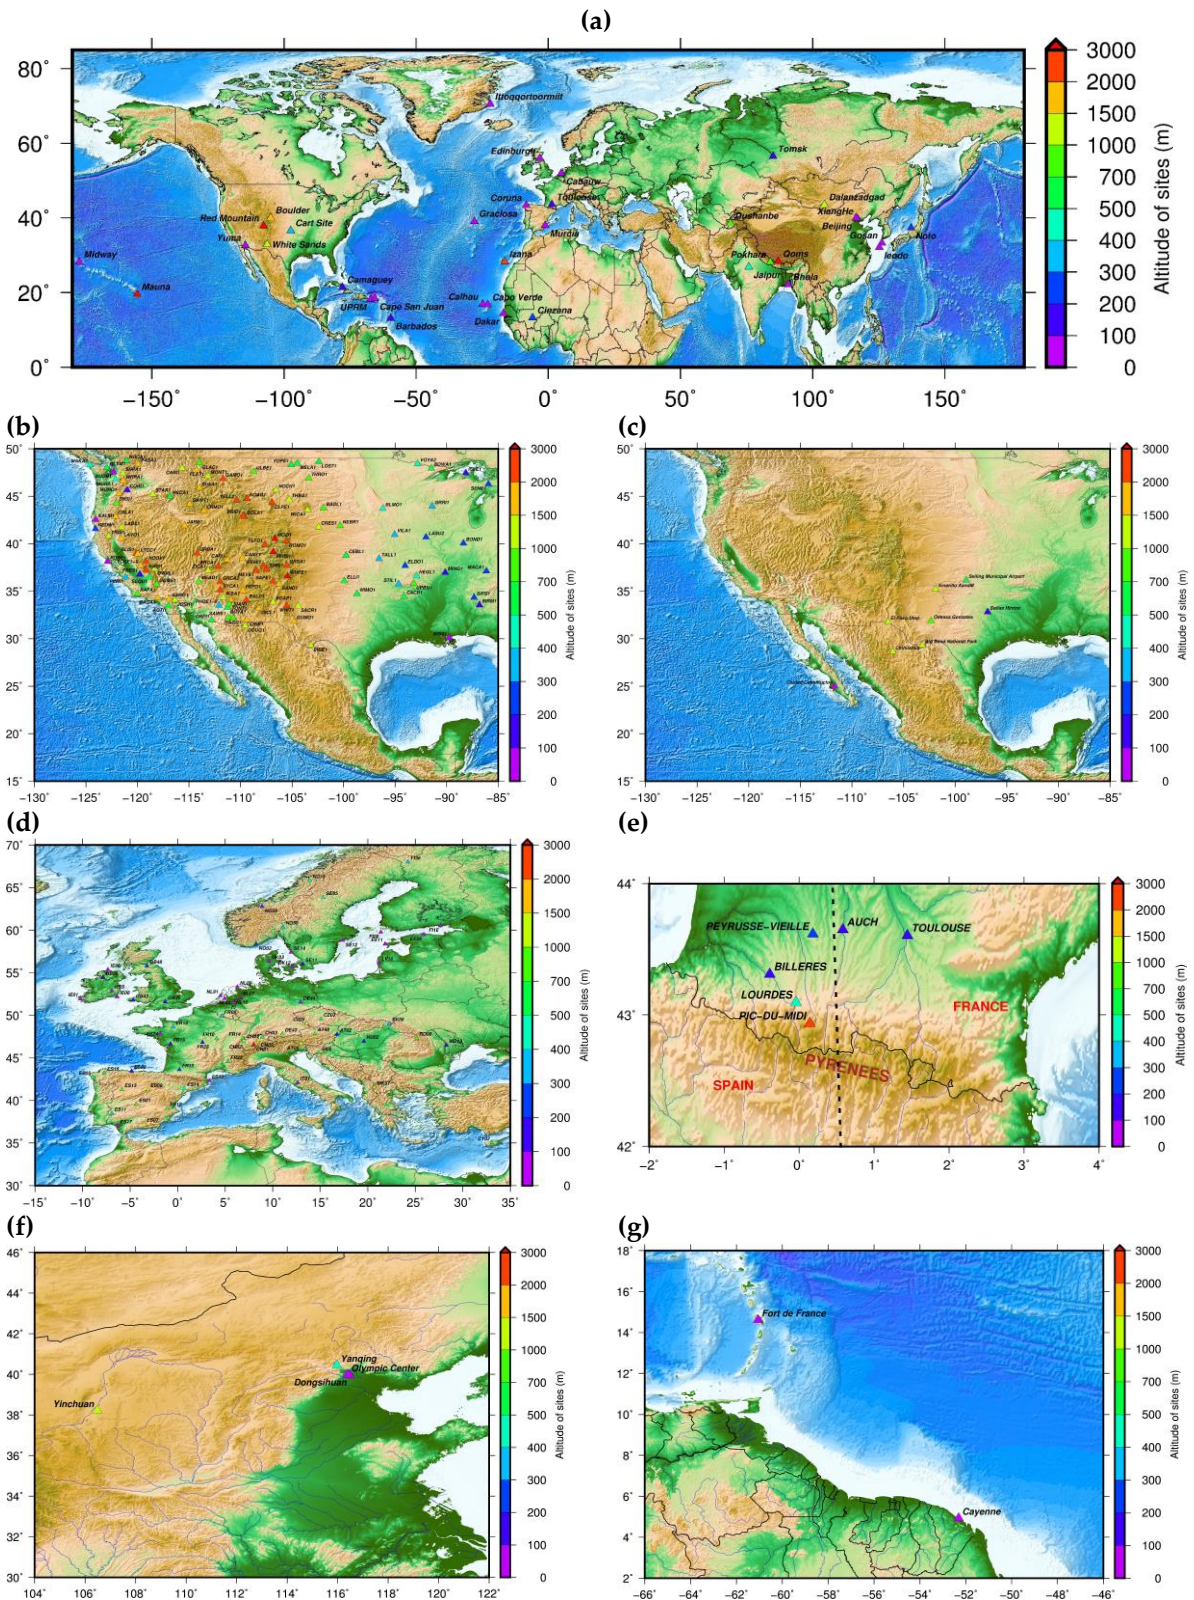

Figure S6. Map of site locations presented in the publication for AERONET stations (a), IMPROVE stations (b), US EPA networks for PM<sub>2.5</sub> data (c), EBAS-EMEP stations (d) see Table S2 for the names of EMEP stations, French stations close to the Pyrenees area (e), Chinese stations (f) and the two stations in the Caribbean area (g).



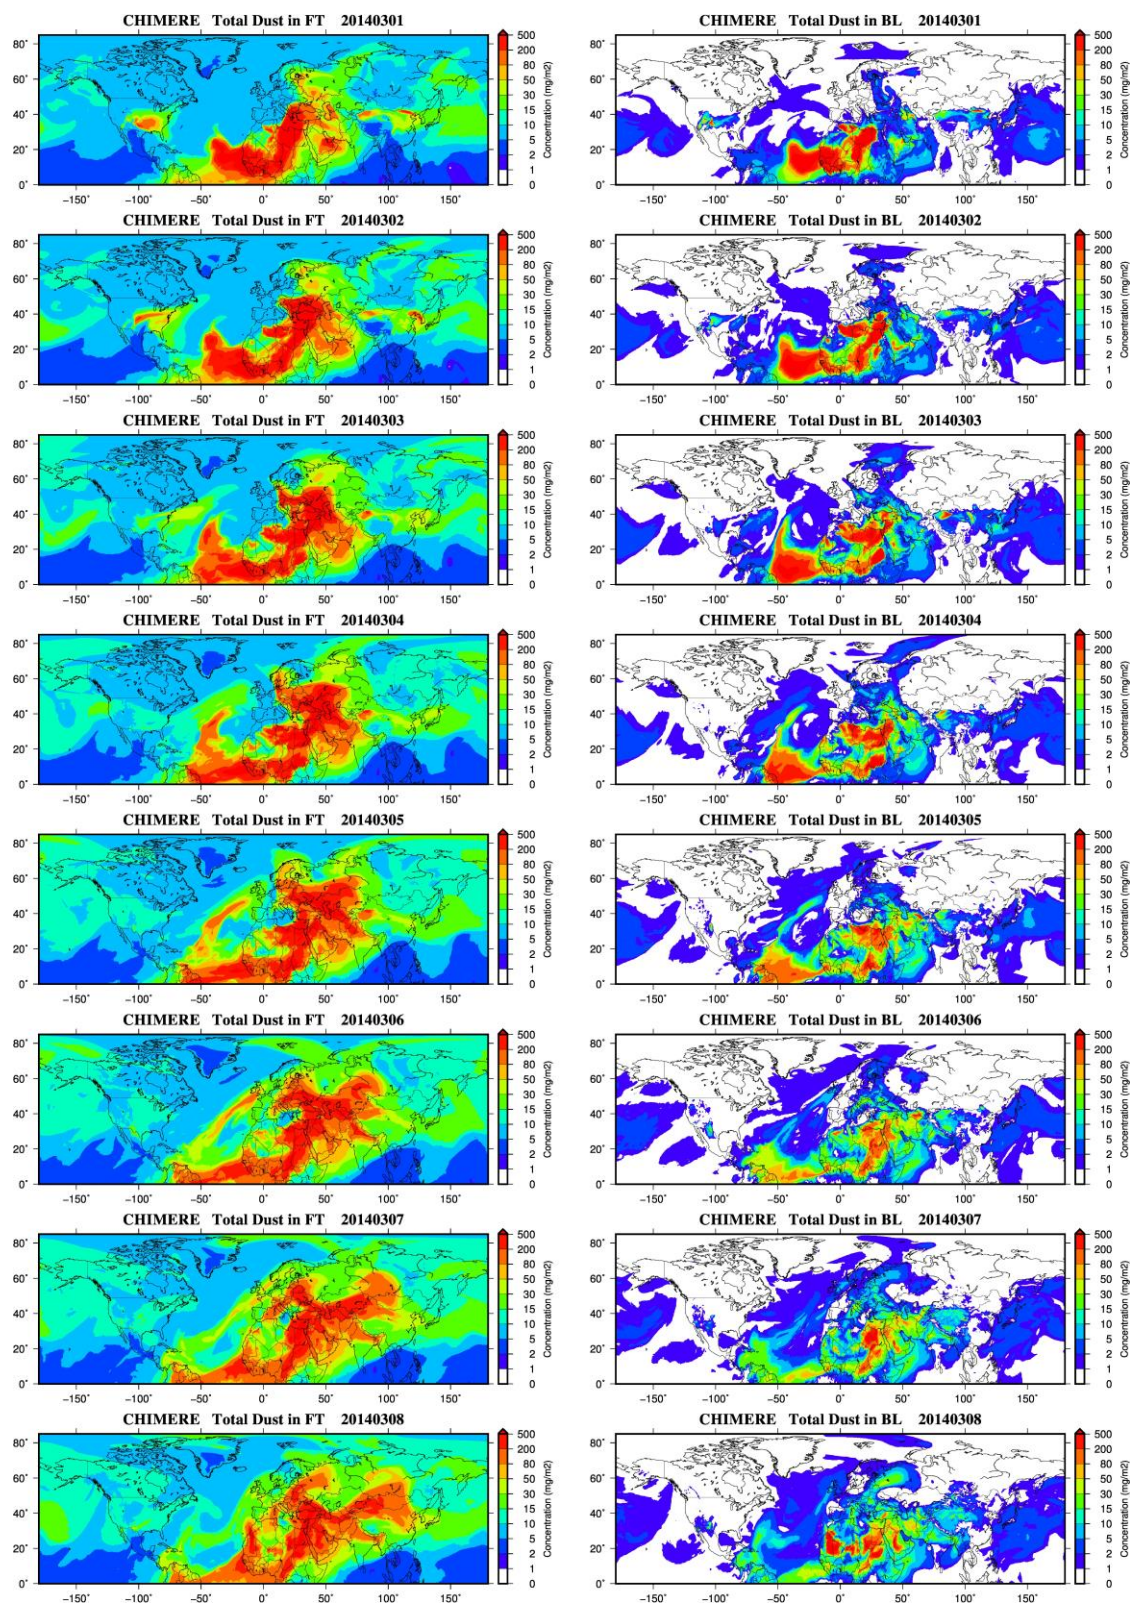

Figure S7. Evolution of mean daily concentrations integrated over the column (in  $\text{g m}^{-2}$ ) of total dust from March 1<sup>st</sup>, to March 8<sup>th</sup>, 2014 in the free troposphere (FT) and the boundary layer (BL)



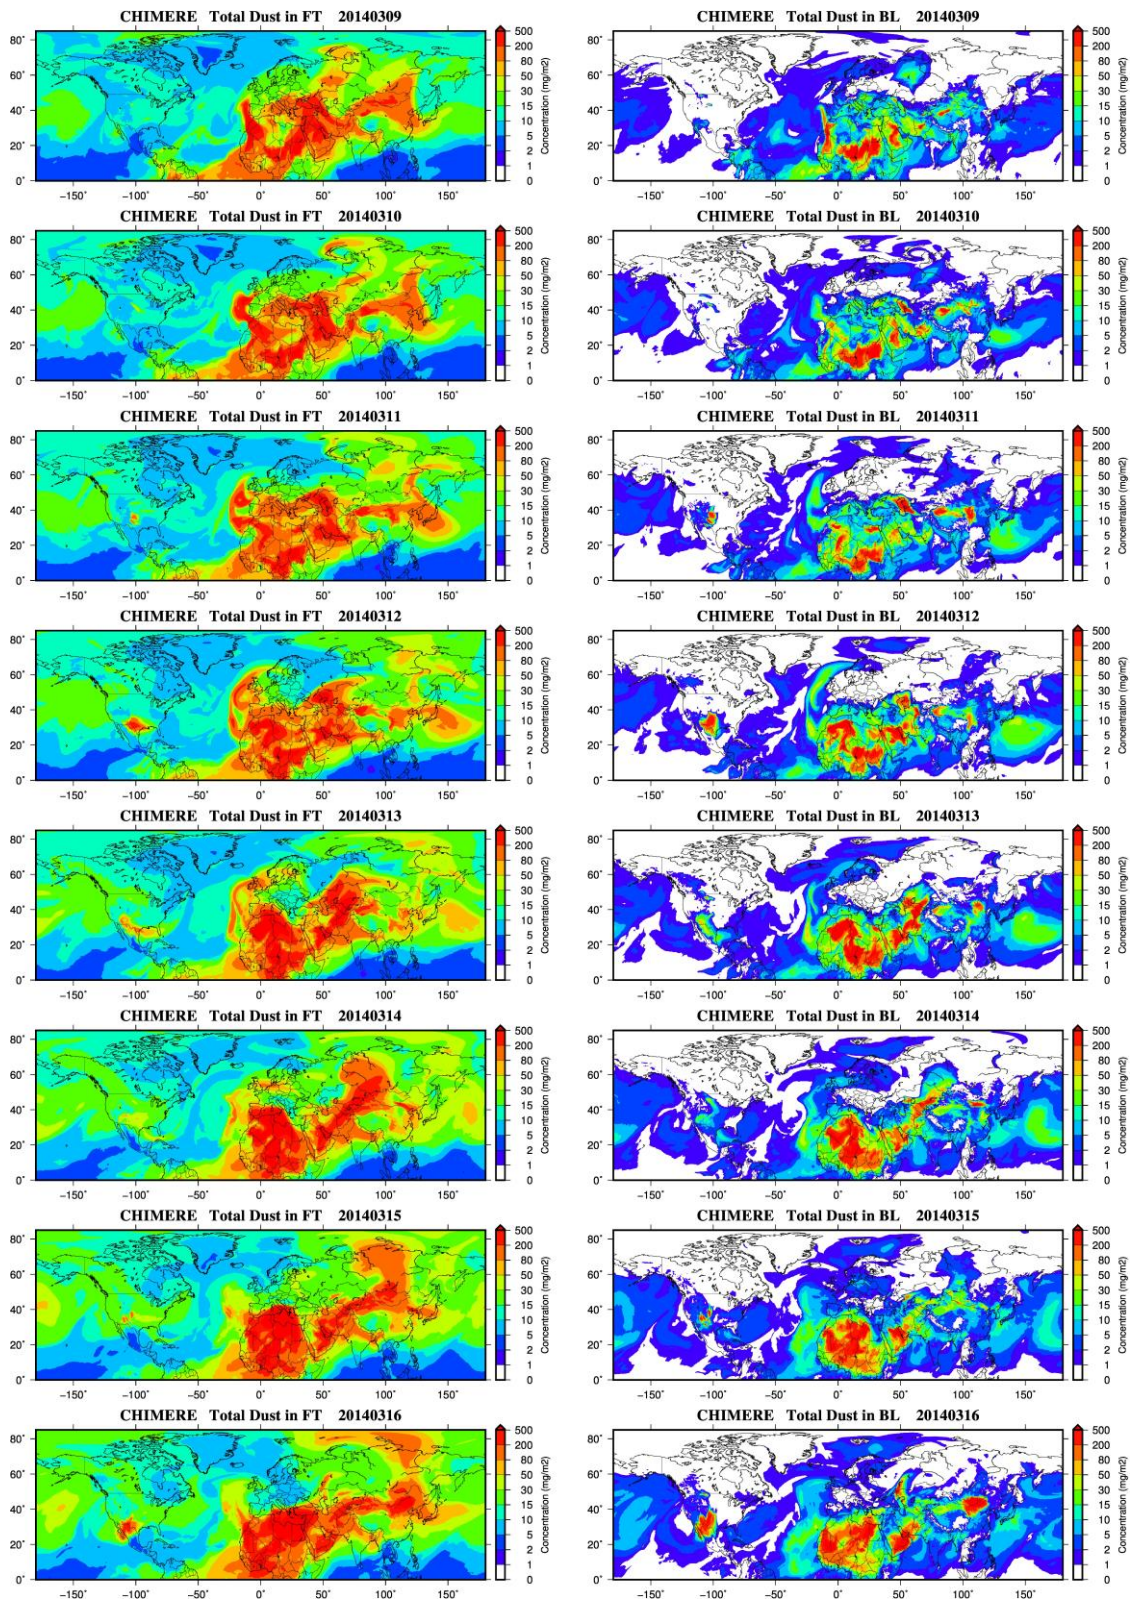

Figure S8. Evolution of mean daily concentrations integrated over the column (in  $\text{g m}^{-2}$ ) of total dust from March 9<sup>th</sup>, to March 16<sup>th</sup>, 2014 in the free troposphere (FT) and the boundary layer (BL)



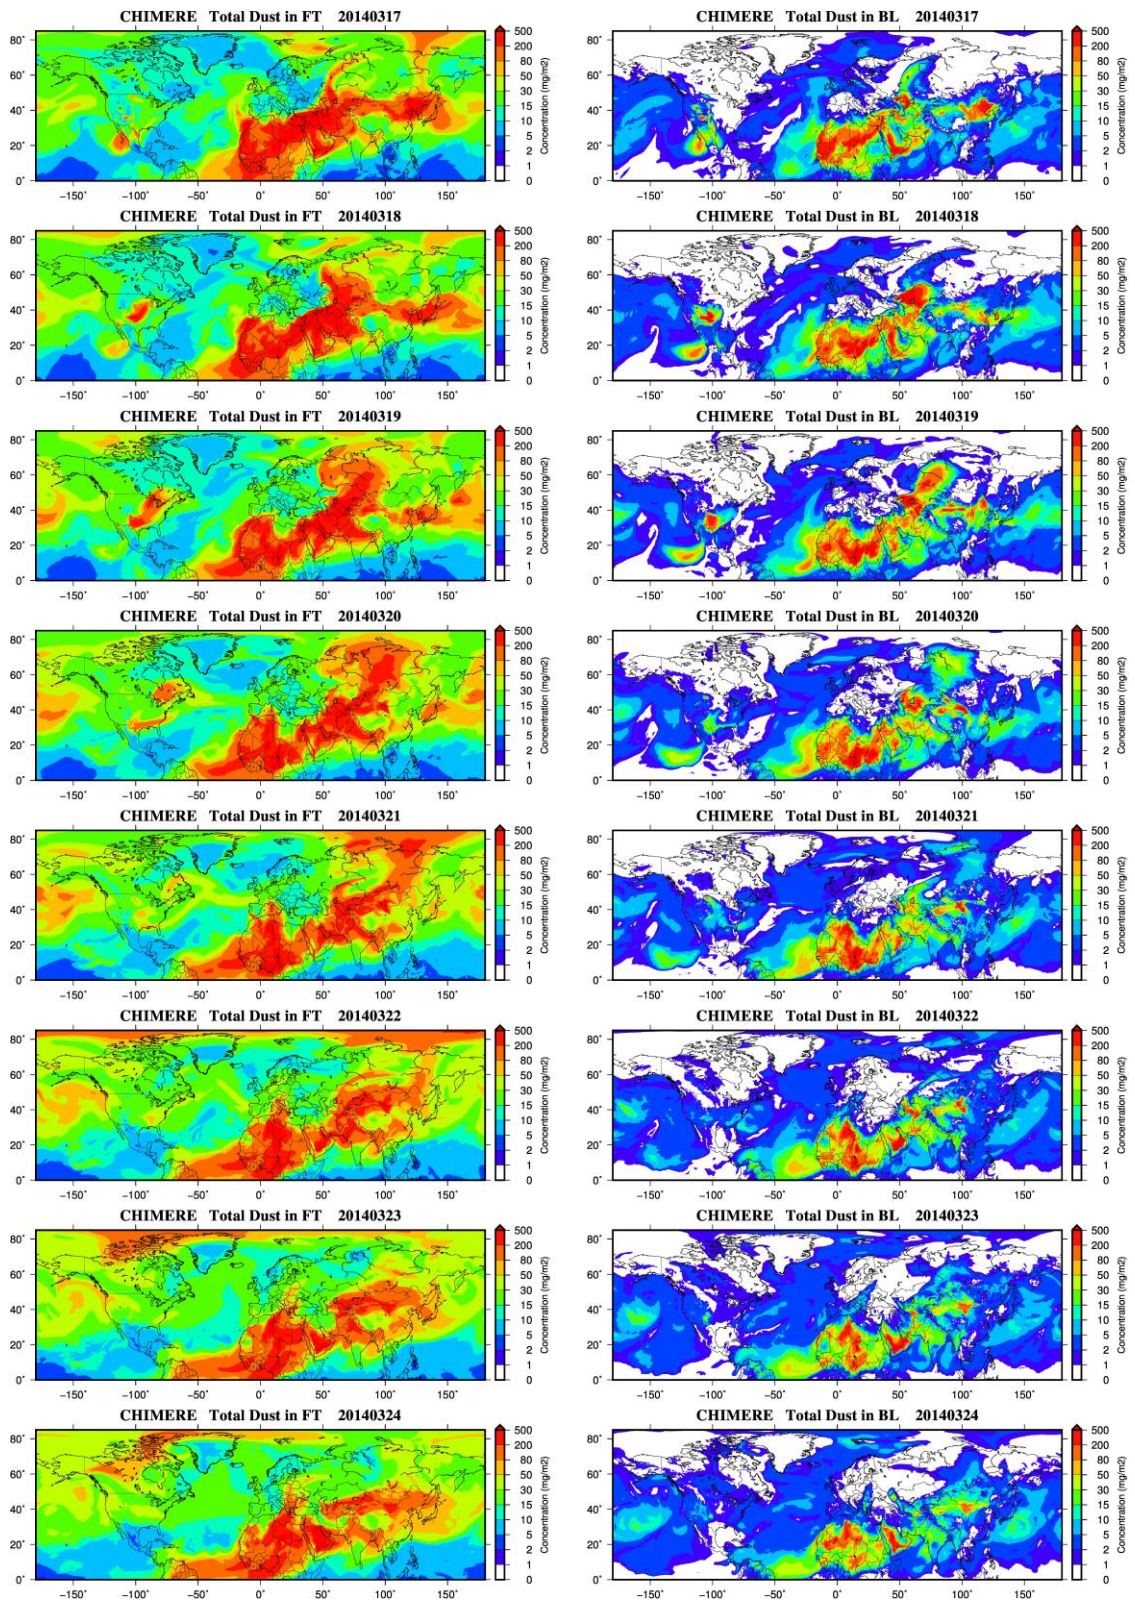

Figure S9. Evolution of mean daily concentrations integrated over the column (in  $\text{g m}^{-2}$ ) of total dust from March 17<sup>th</sup>, to March 24<sup>th</sup>, 2014 in the free troposphere (FT) and the boundary layer (BL)



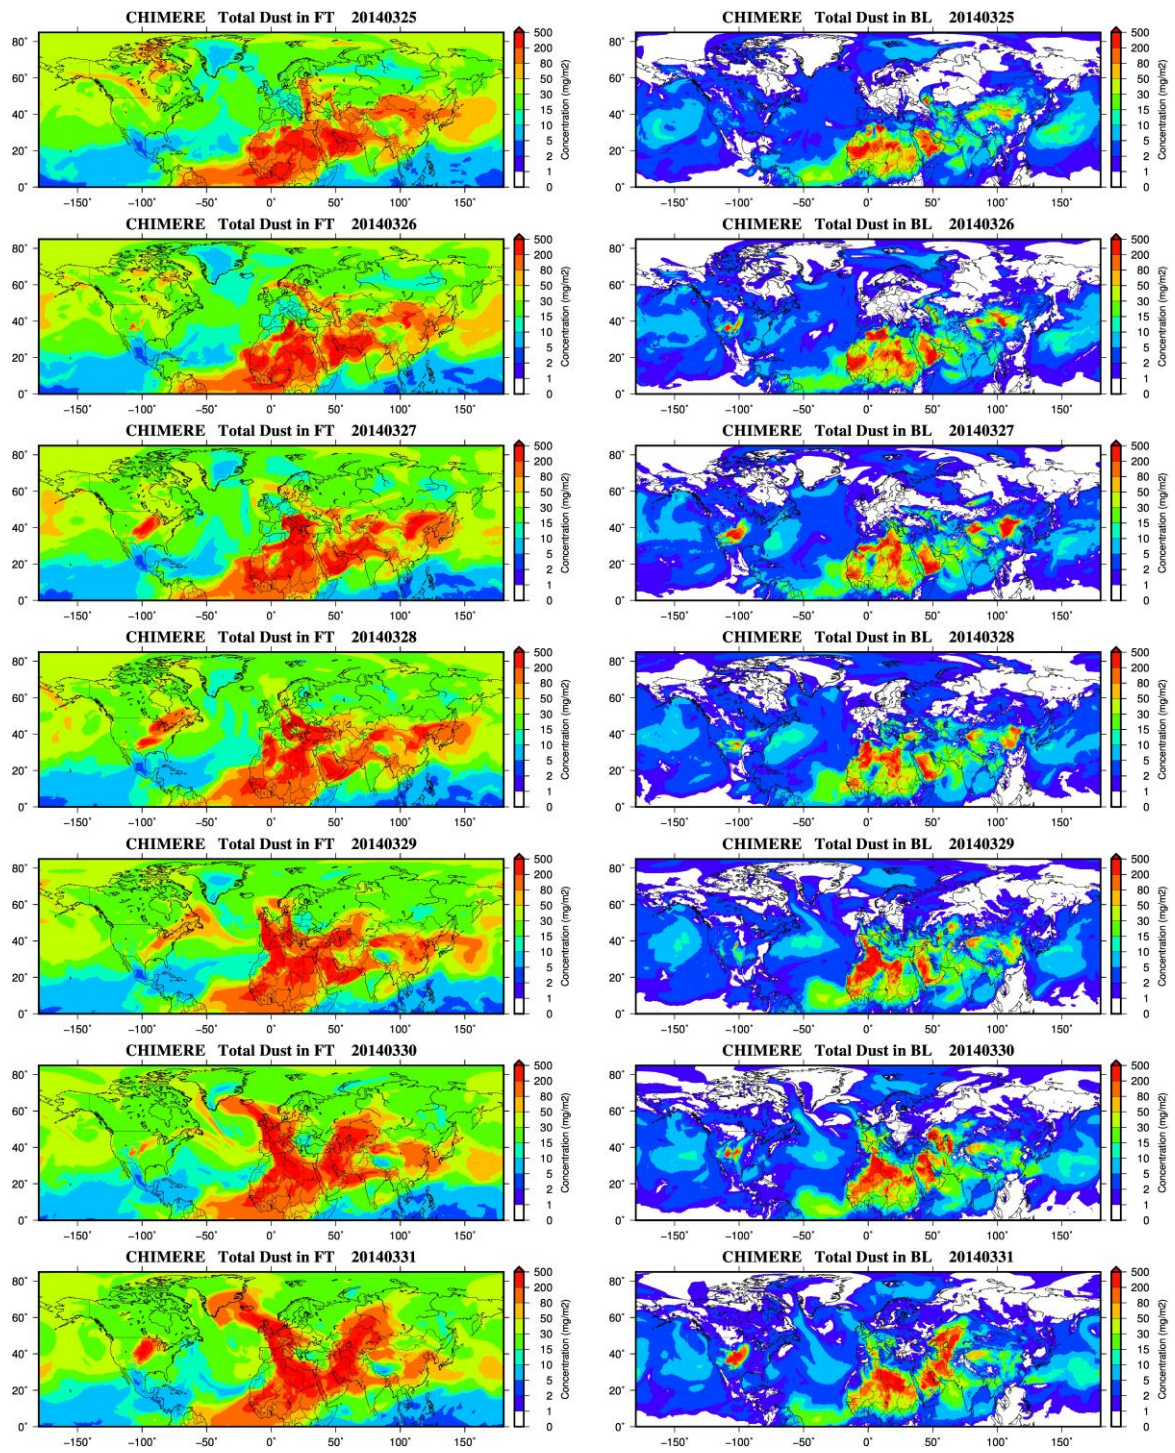

Figure S10. Evolution of mean daily concentrations integrated over the column (in  $\text{g m}^{-2}$ ) of total dust from March 25<sup>th</sup>, to March 31<sup>st</sup>, 2014 in the free troposphere (FT) and the boundary layer (BL)

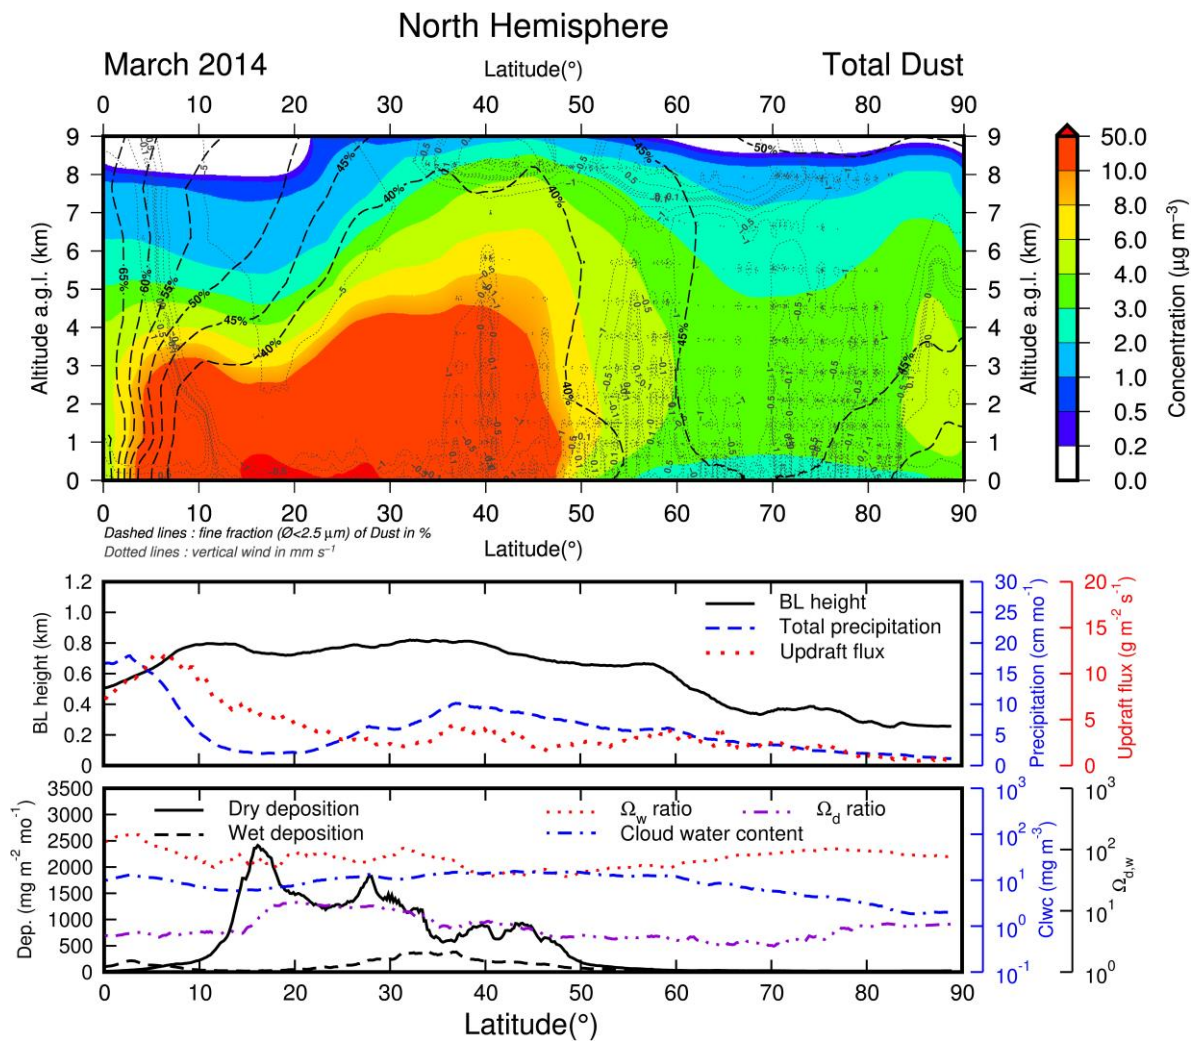

Figure S11. Monthly mean latitudinal cross sections (Altitude a. g. l. versus Latitude °N) for several variables in March 2014 simulated by CHIMERE over the north hemisphere. **Top panels** represent the mean dust concentrations with bold dashed lines representing the fine fraction of total dusts (%), the grey dotted lines are the average zonal winds (conventionally, westerly wind are positive). **Bottom charts** represent the evolution of various parameters along the corresponding cross sections and spatially averaged over the longitude: the boundary layer (BL) height in km, the total precipitation (convective and large scale) in  $\text{cm month}^{-1}$ , the deep convection updraft flux summed over the column in  $\text{g}_{\text{air}} \text{m}^{-2} \text{s}^{-1}$ , the mean cloud water content averaged over the first 10 model layers (approximately 2500m), the wet and dry deposition fluxes of dust sum over time (monthly) in  $\text{mg}_{\text{dust}} \text{m}^{-2} \text{month}^{-1}$  and the ratio  $\Omega$  (unit less) of dry (d) and wet (w) scavenging coefficients coarse versus fine particles as defined in equation 2 in the publication).



### Chihuahua - PM25 & DUST-25

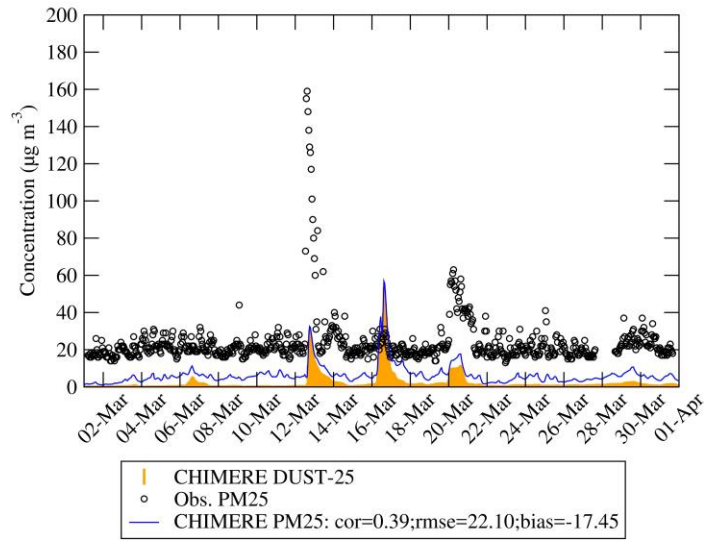

Figure S12. PM2.5 time series at Chihuahua station (Mexico) for CHIMERE and the corresponding observations. The orange shade area represents the dust in the PM2.5 matrix simulated by CHIMERE.

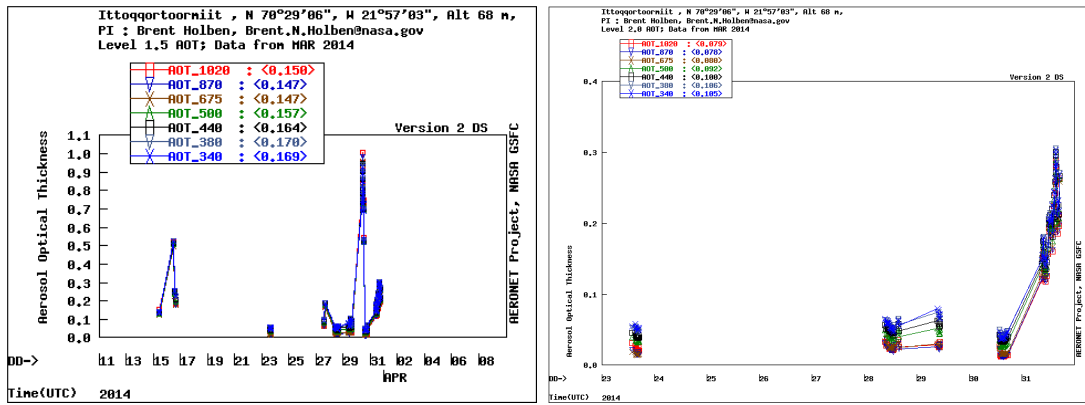

Figure S13. AOD from AERONET network at Ittoqqortoormiit in March 2014, level 1.5 (left) and level 2 (right) (source: NASA, <https://aeronet.gsfc.nasa.gov/> )

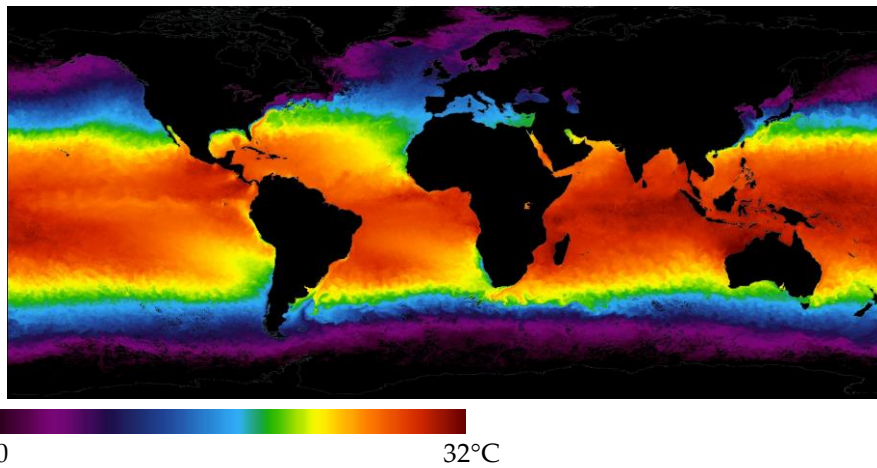

Figure S14. Mean sea surface temperature in March 2014 (source: NASA <https://worldview.earthdata.nasa.gov/> )

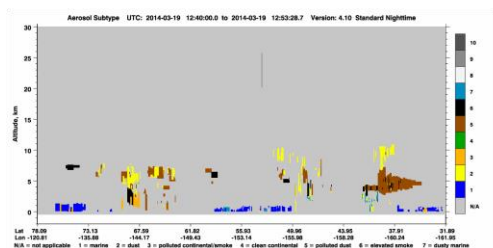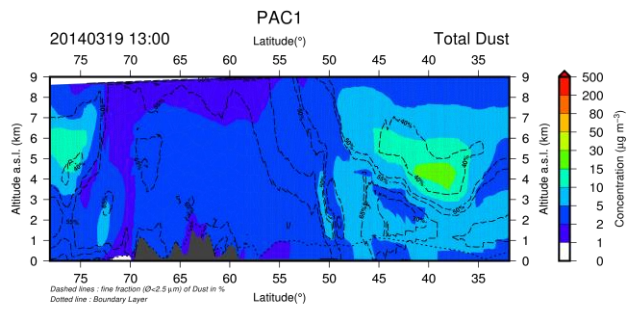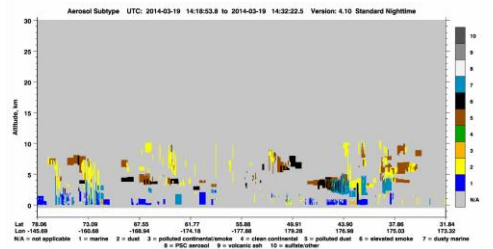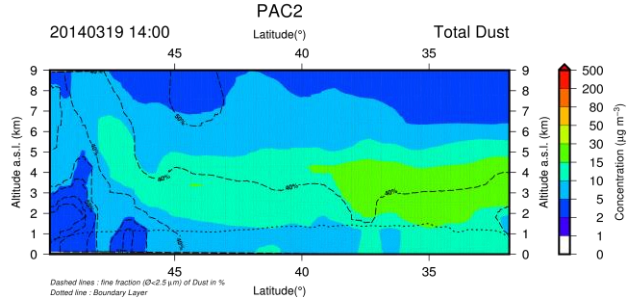

Figure S15. Cross sections of CHIMERE dust concentrations (right) for several orbits zoomed over the highest values area *versus* the corresponding CALIPSO qualitative data (left) showing in yellow the dust load and in orange the polluted dust, for the CALIPSO trajectories PAC-1-2 as reported in Figure 2 in the publication. The dotted line represents the height of the boundary layer, the dashed lines represent the fraction of fine dust in %.

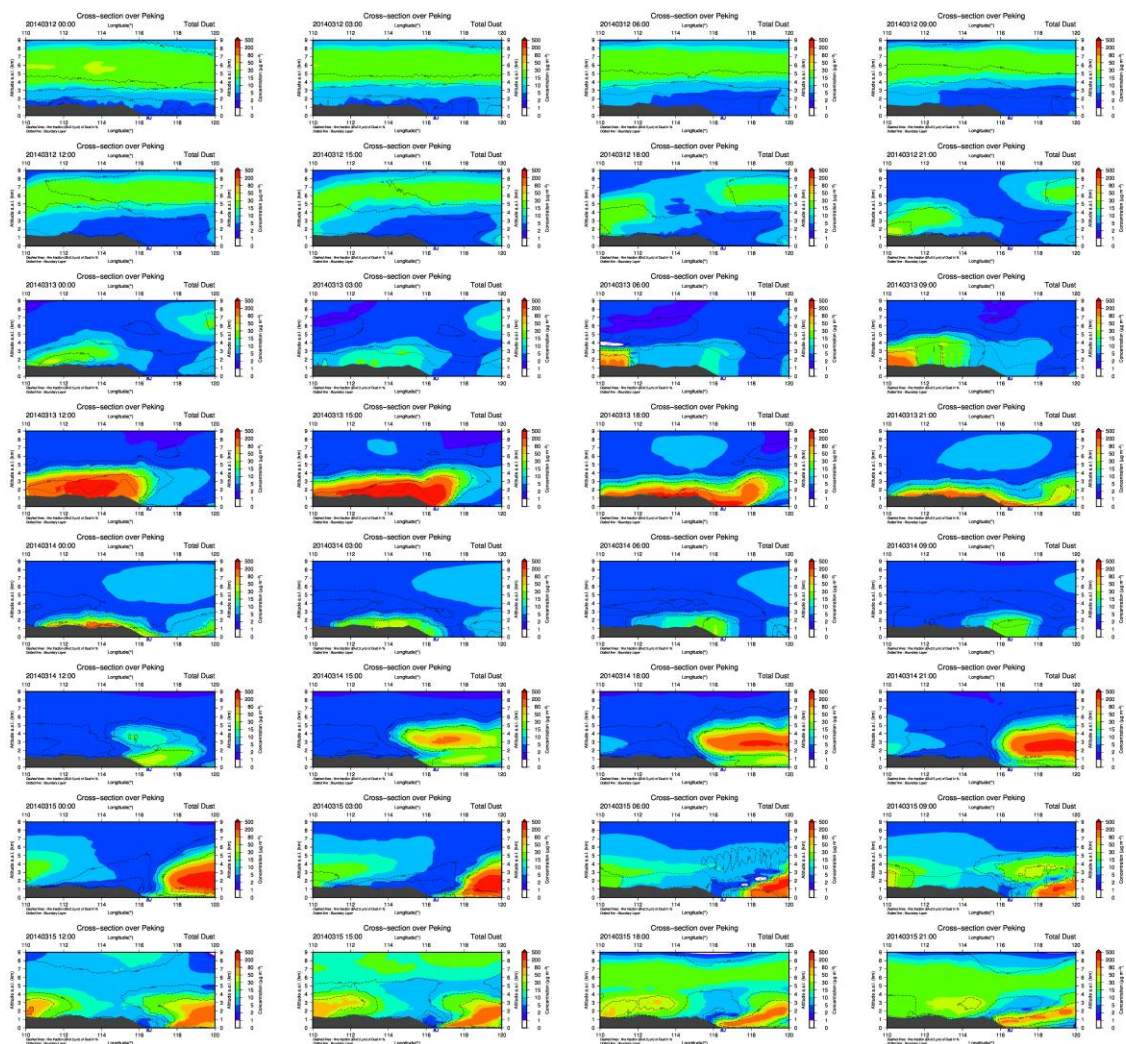

Figure S16. Longitudinal cross section of total dust concentrations fields (Altitude *versus* longitude) at 39.9°N latitude from 110°E to 120°E passing over Beijing (BJ in blue letters) from March 12<sup>th</sup> 00:00 UTC to March 15<sup>th</sup>, 21:00 UTC. The dotted line represents the height of the boundary layer, the dashed lines represent the fraction of fine dust in %.



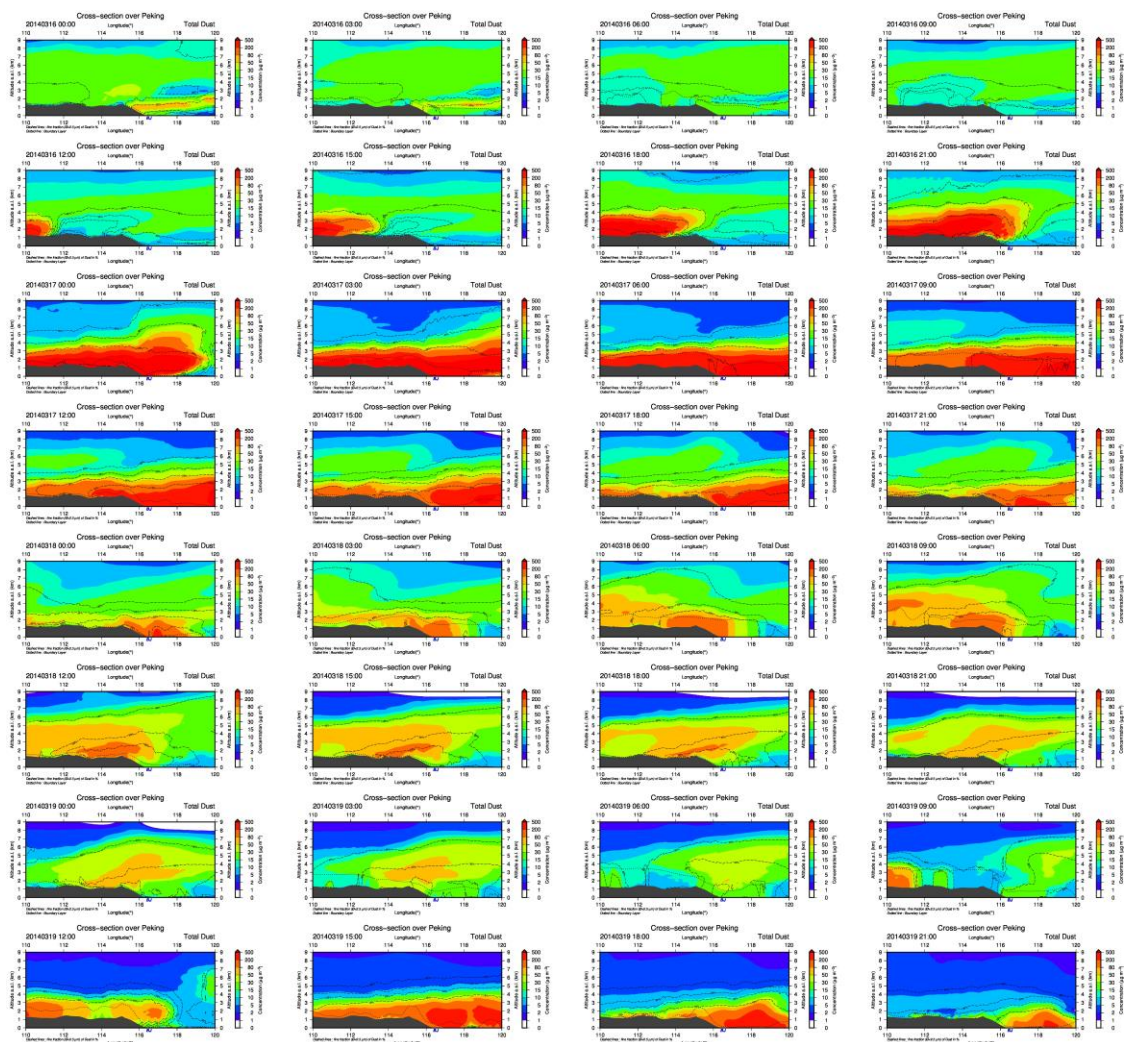

Figure S17. Longitudinal cross section of total dust concentrations fields (Altitude *versus* longitude) at 39.9°N latitude from 110°E to 120°E passing over Beijing (BJ in blue letters) from March 16<sup>th</sup> 00:00 UTC to March 19<sup>th</sup>, 21:00 UTC. The dotted line represents the height of the boundary layer, the dashed lines represent the fraction of fine dust in %.
